# Supplementary material
Source: publisher figshare collection journal article supplement (https://frontiersin.figshare.com/ndownloader/files/21699573)
Supplement: Supplementary file [file 21699573]

Supplementary Data\_Raw Irradiance in 5 nm bands.txt

| wavelength (nm) | spectral irradiance ( $\mu\text{W}/\text{cm}^2$ ) |
|-----------------|---------------------------------------------------|
| 380             | 0.226985169                                       |
| 385             | 0.2449198                                         |
| 390             | 0.312174665                                       |
| 395             | 0.440519365                                       |
| 400             | 0.935963537                                       |
| 405             | 24.32384281                                       |
| 410             | 4.068919327                                       |
| 415             | 4.634981107                                       |
| 420             | 6.893623654                                       |
| 425             | 9.808001134                                       |
| 430             | 13.2267901                                        |
| 435             | 103.6845834                                       |
| 440             | 20.00832231                                       |
| 445             | 22.19410542                                       |
| 450             | 24.94034574                                       |
| 455             | 27.23822029                                       |
| 460             | 28.91959191                                       |
| 465             | 30.15259777                                       |
| 470             | 30.60096354                                       |
| 475             | 30.71305498                                       |
| 480             | 33.51534102                                       |
| 485             | 57.16663518                                       |
| 490             | 57.72709239                                       |
| 495             | 45.22889666                                       |
| 500             | 34.13184394                                       |
| 505             | 23.93152277                                       |
| 510             | 20.45668808                                       |
| 515             | 17.93463064                                       |
| 520             | 15.63675609                                       |
| 525             | 13.67515587                                       |
| 530             | 12.38610429                                       |
| 535             | 20.7929624                                        |
| 540             | 95.83818251                                       |
| 545             | 195.0391083                                       |
| 550             | 72.85943699                                       |
| 555             | 19.50391083                                       |
| 560             | 7.229897978                                       |
| 565             | 5.828754959                                       |
| 570             | 5.419621198                                       |
| 575             | 18.38299641                                       |
| 580             | 37.77481579                                       |
| 585             | 42.9310221                                        |
| 590             | 40.68919327                                       |
| 595             | 29.48004912                                       |
| 600             | 23.65129416                                       |
| 605             | 19.50391083                                       |
| 610             | 154.6861893                                       |
| 615             | 84.62903835                                       |
| 620             | 37.43854147                                       |
| 625             | 37.94295296                                       |
| 630             | 42.59474778                                       |
| 635             | 17.8225392                                        |
| 640             | 15.30048177                                       |
| 645             | 14.74002456                                       |
| 650             | 16.64557907                                       |
| 655             | 12.72237861                                       |
| 660             | 12.27401285                                       |
| 665             | 12.10587568                                       |
| 670             | 8.79917816                                        |
| 675             | 8.014538069                                       |
| 680             | 7.454080862                                       |
| 685             | 7.566172303                                       |

|     | Supplementary Data_Raw Irradiance in 5 nm bands.txt |
|-----|-----------------------------------------------------|
| 690 | 8. 294766673                                        |
| 695 | 6. 277120725                                        |
| 700 | 3. 850341016                                        |
| 705 | 10. 42450406                                        |
| 710 | 17. 14999055                                        |
| 715 | 6. 277120725                                        |
| 720 | 2. 275456263                                        |
| 725 | 1. 972809371                                        |
| 730 | 1. 731812772                                        |
| 735 | 1. 445979596                                        |
| 740 | 1. 496420744                                        |
